# Supplementary material for: Deep Brain Stimulation for Cockayne Syndrome-Associated Movement Disorder
Source: PubMed Central journal article supplement — J Mov Disord. 2021 Nov 3;15(1):62–5. doi: 10.14802/jmd.21005 (PMC8820887; doi:10.14802/jmd.21005), 2021-11-03
Supplement: jmd-21005-suppl.pdf [file jmd-21005-suppl.pdf]

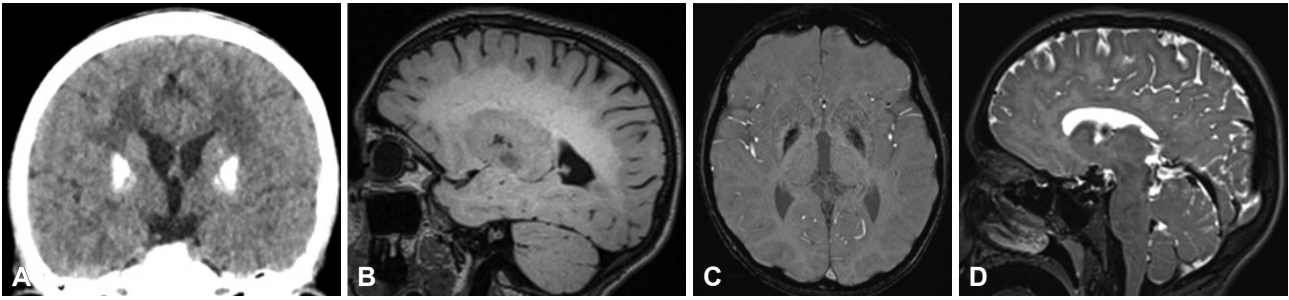

**Supplementary Figure 1.** Neuroimaging characteristics of Cockayne syndrome. Neuroimaging characteristics of Cockayne syndrome, including basal ganglia calcifications shown on the CT of the head (A), white matter abnormalities on T2 fluid-attenuated inversion recovery (B), basal ganglia susceptibility on susceptibility weighted imaging (C), and cerebral atrophy with predominant white matter loss on T2 (D) were noted in our patient.
